# Supplementary material
Source: Springer Nature journal article supplement (https://www.springermedizin.de/resource/supplementary/13002_2009_147_MOESM1_ESM.pdf/9627256)
Supplement: MOESM1 [file 9627256]

**Table 1: Ethnobotany of trees in Fundong**

| No. spp | Family/ Species                                    | Common/ local name | Habitat | Observation | Traditional uses                                                                                              | Freq | Parts used in medicine | Diseases treated                                  | Preparation and Administration                                                                                                                       |
|---------|----------------------------------------------------|--------------------|---------|-------------|---------------------------------------------------------------------------------------------------------------|------|------------------------|---------------------------------------------------|------------------------------------------------------------------------------------------------------------------------------------------------------|
| 1       | <b>Agavaceae</b><br><i>Dracaena arborea</i> Baker  | Anchochom          | IS      | Available   | Grown in compounds as a panacea for witchcraft.<br>Wood carving, Construction of bridges, Musical instruments | 8    | Leaves<br>Whole plant  | Liver disorders<br>Witchcraft                     | Decoction is taken orally.<br>Plant is grown in the compound.                                                                                        |
| 2       | <b>Anacardiaceae</b><br><i>Mangifera indica</i> L. | Mango tree         | ES      | Available   | Fruits are eaten, Medicine<br>Agroforestry, Honey production,                                                 | 26   | Bark<br>Leaves         | Dental caries<br>Syphilis, Malaria, Typhoid fever | Pulverized bark is applied topically or hot decoction is used as mouth wash.<br>Concoction with the bark of <i>Persea americana</i> is taken orally. |
| 3       | <b>Annonaceae</b><br><i>Annona muricata</i> L.     | Sweetsop           | IS      | Available   | Used in agroforestry systems, Fruits are eaten                                                                | 5    |                        |                                                   |                                                                                                                                                      |
| 4       | <b>Annonaceae</b><br><i>Annona squamosa</i> L.     | Soursop            | IS      | Few         | Fruits are eaten, Used in agroforestry                                                                        | 9    |                        |                                                   |                                                                                                                                                      |

|   |                                                                          |             |    |      | systems                                                                 |    |           |                                     |                                                         |  |
|---|--------------------------------------------------------------------------|-------------|----|------|-------------------------------------------------------------------------|----|-----------|-------------------------------------|---------------------------------------------------------|--|
| 5 | <b>Annonaceae</b><br><i>Artocarpus altilis</i><br>(Pakinson )<br>Fosberg | Bread fruit | IS | Few  | Fruits are eaten,<br>Provides timber<br>and shade in<br>farms, Medicine | 3  |           |                                     |                                                         |  |
| 6 | <b>Apocynaceae</b><br><i>Alstonia boonei</i><br>De Wild                  | -           | IS | Few  | Fuelwood,<br>Medicine                                                   | 17 | Roots     | Epilepsy                            | Decoction is taken orally.                              |  |
|   |                                                                          |             |    |      |                                                                         |    | Bark      | Mental retardation, malaria, hernia | Cold infusion is taken orally or as enema until healed. |  |
|   |                                                                          |             |    |      |                                                                         |    | Latex     | Snake bite                          | Latex of stem is applied topically.                     |  |
| 7 | <b>Apocynaceae</b><br><i>Rauvolfia vomitoria</i><br>Afzel.               | Ijah        | IS | Few  | Medicine, Honey production                                              | 27 | Root bark | Snake bite                          | Paste is applied topically.                             |  |
|   |                                                                          |             |    |      |                                                                         |    | Bark      | Hypertension,                       | Decoction is taken orally.                              |  |
|   |                                                                          |             |    |      |                                                                         |    | Leaves    | Menstrual pains, Intestinal worms   | Pulverized with water is taken as an enema.             |  |
| 8 | <b>Apocynaceae</b><br><i>Voacanga africana</i><br>Stapf.                 | Utong       | IS | Rare | Medicine                                                                | 23 | Bark      | Poisons                             | Bark decoction is taken orally.                         |  |
|   |                                                                          |             |    |      |                                                                         |    | Fruits    | Vision                              | Juice is used as eye drop.                              |  |
|   |                                                                          |             |    |      |                                                                         |    | Leaves    | Gonorrhoea                          | Concoction with <i>Vitex doniana</i> fruits is taken    |  |

|    |                                                                         |               |    |           |                                                               |    |                    |                                                           |                                                                                           |
|----|-------------------------------------------------------------------------|---------------|----|-----------|---------------------------------------------------------------|----|--------------------|-----------------------------------------------------------|-------------------------------------------------------------------------------------------|
|    |                                                                         |               |    |           |                                                               |    | Roots              | Carious teeth                                             | orally.<br>Pulverized root bark is applied topically.                                     |
| 9  | <b>Araliaceae</b><br><i>Polyscias fulva</i><br>(Hiern) Harms            | Umbrella tree | IS | Few       | Wood carving, Medicine, Honey production, Musical instruments | 17 | Leaves<br>Bark     | Jaundice, Headache<br>Pneumonia                           | Infusion is taken orally.<br>Concoction with <i>Pennisetum purpureum</i> is taken orally. |
| 10 | <b>Araliaceae</b><br><i>Schefflera abyssinica</i><br>Horst.Ex. A. Rich. | Uwoh          | IS | Available | Honey production, Fuelwood, Construction                      | 3  |                    |                                                           |                                                                                           |
| 11 | <b>Araliaceae</b><br><i>Schefflera manii</i><br>(Hook.f.) Harms         | Uwos          | IS | Many      | Construction, Honey production, Fuelwood                      | 7  |                    |                                                           |                                                                                           |
| 12 | <b>Arecaceae</b><br><i>Cocos nucifera</i> L.                            | Coconut palm  | IS | Few       | Fruits are eaten, Fuelwood, Agroforestry                      | 7  | Fruit<br>Root      | Difficult lactation, Dandruff, Scabies.<br>Liver ailments | Fruits are eaten.<br>Decoction is taken orally.                                           |
| 13 | <b>Arecaceae</b><br><i>Elaeis guineensis</i><br>Jack.Jack               | Asomme        | ES | Available | Fuelwood, Fruits are eaten, Agroforestry, Honey production,   | 15 | Wine<br>Kernel oil | Difficult lactation<br>Anticonvulsant,                    | Fresh wine is drunk<br>Oil is applied on the body and is taken orally with                |

|    |                                                                              |                 |    |     |                                                                    |    |                 |                                                                          |                                                                                    |
|----|------------------------------------------------------------------------------|-----------------|----|-----|--------------------------------------------------------------------|----|-----------------|--------------------------------------------------------------------------|------------------------------------------------------------------------------------|
|    |                                                                              |                 |    |     | Medicine                                                           |    | Nuts            | Dysentery                                                                | salt.<br>Nuts are eaten<br>with pulverized<br>leaves of <i>Psidium<br/>guajava</i> |
| 14 | <b>Arecaceae</b><br><i>Phoenix dactylifera</i><br>L                          | Date palm       | ES | Few | Ornamentals                                                        | 12 |                 |                                                                          |                                                                                    |
| 15 | <b>Bignoniaceae</b><br><i>Kigelia africana</i><br>(Lam.) Benth.              | Atem            | ES | Few | Medicine, Honey<br>production                                      | 31 | Bark,<br>Fruits | Male sexual<br>impotence<br>Rheumatism,<br>Pneumonia,<br>Wounds, Filaria | Decoction is taken<br>orally.<br>Concoction with<br>lime is taken<br>orally.       |
| 16 | <b>Bignoniaceae</b><br><i>Markhamia lutea</i><br>(Benth) K. Schum<br>ex Engl | Eyngweh<br>atum | IS | Few | Tool handles and<br>wood carving,<br>Honey<br>production,<br>Shade | 2  |                 |                                                                          |                                                                                    |
| 17 | <b>Bignoniaceae</b><br><i>Markhamia<br/>tomentosa</i> K.<br>Schum ex Engl ex | Eyngueh         | IS | Few | Tool handles and<br>wood carving,<br>Honey<br>production           | 6  | Bark            | Male sexual<br>impotence                                                 | Decoction is taken<br>orally.                                                      |

|    |                                                                     |               |    |           |                                                                                          |    |                    |                                                        |                                                                                                                            |
|----|---------------------------------------------------------------------|---------------|----|-----------|------------------------------------------------------------------------------------------|----|--------------------|--------------------------------------------------------|----------------------------------------------------------------------------------------------------------------------------|
|    | Engl                                                                |               |    |           | Fuelwood,<br>Planted on<br>boundaries,<br>Medicine                                       |    |                    |                                                        |                                                                                                                            |
| 18 | <b>Bignoniaceae</b><br><i>Spathodea<br/>campanulata</i> P.<br>Beauv | -             | IS | Few       | Fuelwood,<br>Medicine                                                                    | 18 | Bark<br><br>Leaves | Malaria<br><br>Mental<br>disorders<br><br>Haemorrhoids | Decoction is taken<br>orally.<br>Drop cold infusion<br>into nostrils.<br><br>Pulverized leaves<br>are applied<br>topically |
| 19 | <b>Bixaceae</b><br><i>Bixa orellana</i> L.                          | Lipstick tree | IS | Few       | Red pigment is<br>used as a natural<br>lipstick and in<br>traditional<br>ceremonies      | 5  |                    |                                                        |                                                                                                                            |
| 20 | <b>Boraginaceae</b><br><i>Cordia millenii</i> Bak                   | -             | IS | Available | Fuelwood,<br>Mecicine                                                                    | 4  | Leaves             | Convulsion in<br>children                              | Concoction with<br><i>Centella asiatica</i> is<br>taken orally.                                                            |
| 21 | <b>Burseraceae</b><br><i>Canarium<br/>schweinfurthii</i><br>Engle   | Ambah         | IS | Few       | Fruits are eaten,<br>Honey<br>production,<br>Timber for<br>consruction,<br>Agroforestry. | 15 | Resin              | Chest pain                                             | Pulverized resin<br>mixed with palm<br>oil is taken orally.                                                                |
| 22 | <b>Burseraceae</b><br><i>Dacryodes edulis</i><br>(G. Don) H.J. Lam  | Ajong         | IS | Few       | Fruits are eaten<br>Agroforesty,<br>Honey<br>production.                                 | 18 | Leaves             | Convulsion in<br>children                              | Concoction with<br><i>Centella asiatica</i> is<br>taken orally.                                                            |

|    |                                                                          |            |    |           |                                                                     |    |                                             |                                                                                          |                                                                                                                                                                                                                           |
|----|--------------------------------------------------------------------------|------------|----|-----------|---------------------------------------------------------------------|----|---------------------------------------------|------------------------------------------------------------------------------------------|---------------------------------------------------------------------------------------------------------------------------------------------------------------------------------------------------------------------------|
| 23 | <b>Caesalpinaceae</b><br><i>Cassia leptophylla</i> L                     | -          | ES | Available | Ornamentals,<br>Honey<br>production,<br>Fodder                      | 16 |                                             |                                                                                          |                                                                                                                                                                                                                           |
| 24 | <b>Caricaceae</b><br><i>Carica papaya</i> L.                             | Pawpaw     | ES | Available | Fruits are eaten,<br>Medicine, Honey<br>production,<br>Insecticides | 34 | Seeds,<br>Fruits<br><br>Leaves<br><br>Seeds | Round worms,<br>Diabetes,<br>Anaemia,<br>Asthma<br>Malaria,<br>Jaundice<br><br>Dysentery | Seeds are chewed<br>and juice from<br>ripe fruits is taken<br>orally.<br>Dry leaves are<br>taken as tea.<br>Concoction with<br><i>Cymbopogon</i><br><i>citratuss</i> is taken<br>orally<br>Seeds are chewed<br>with salt. |
| 25 | <b>Casuarinaceae</b><br><i>Casuarina</i><br><i>equisetifolia</i> Forssk. | -          | ES | Few       | Ornamental,<br>Shade, Timber<br>for constructing<br>materials       | 7  |                                             |                                                                                          |                                                                                                                                                                                                                           |
| 26 | <b>Combretaceae</b><br><i>Terminalia catapa</i><br>L.                    | Shade tree | IS | Few       | Shade, Medicine                                                     | 11 | Leaves                                      | Diabetes<br><br>Diarrhea                                                                 | Infusion or<br>maceration is<br>orally taken.<br>Pulverized leaves<br>mixed with kernel<br>oil are taken<br>orally.                                                                                                       |
| 27 | <b>Cupressaceae</b>                                                      | Cypress    | ES | Available | Timber for                                                          | 21 |                                             |                                                                                          |                                                                                                                                                                                                                           |

|    |                                                                      |           |    |           |                                                                      |    |                                   |                                                             |                                                                                                                                            |
|----|----------------------------------------------------------------------|-----------|----|-----------|----------------------------------------------------------------------|----|-----------------------------------|-------------------------------------------------------------|--------------------------------------------------------------------------------------------------------------------------------------------|
|    | <i>Cupressus benthamii</i> Gord.                                     |           |    |           | construction, Fuelwood, shade, Honey production, Insecticides.       |    |                                   |                                                             |                                                                                                                                            |
| 28 | <b>Ericaceae</b><br><i>Agauria salicifolia</i> Hook.f. Olive.        | Ling      | IS | Available | Fuelwood, ropes and construction material                            | 11 | Leaves, Bark                      | Syphilis                                                    | Decoction is taken orally                                                                                                                  |
| 29 | <b>Euphorbiaceae</b><br><i>Aleurites montana</i> (Lour.) H.E.Wilson  | Jung tree | IS | Rare      | Ornamental, Shade                                                    | 3  |                                   |                                                             |                                                                                                                                            |
| 30 | <b>Euphorbiaceae</b><br><i>Bridelia speciosa</i> Mull. Arg.          | Sem       | IS | Few       | Tool handles, Fuelwood, Medicine                                     | 5  | Leaves                            | Diabetes, constipation                                      | Maceration or infusion of leaves is taken orally.                                                                                          |
| 31 | <b>Euphorbiaceae</b><br><i>Croton macrostachyus</i> Hochst.ex Delile | Ejuam     | IS | Many      | Wood carving, Tool handles, Fuelwood, Insecticide, Honey production. | 10 | Bark                              | Pneumonia                                                   | Decoction is taken orally.                                                                                                                 |
| 32 | <b>Euphorbiaceae</b><br><i>Jatropha curcas</i> L.                    | -         | ES | Few       | Medicine                                                             | 9  | Roots<br>Leaves<br>Seeds<br>Latex | Epilepsy<br>Gastritis<br>Abortifacient,<br>Mental disorders | Decoction is taken orally<br>Maceration is taken orally with lemon.<br>Seeds are burnt and eaten.<br>Pulverized dry seeds are taken orally |

|    |                                                                         |           |    |           |                                                                                    |    |                     |                                                     |                                                                           |
|----|-------------------------------------------------------------------------|-----------|----|-----------|------------------------------------------------------------------------------------|----|---------------------|-----------------------------------------------------|---------------------------------------------------------------------------|
|    |                                                                         |           |    |           |                                                                                    |    |                     | Wounds                                              | Latex is applied topically.                                               |
|    |                                                                         |           |    |           |                                                                                    |    |                     | Poisoning                                           | Pulverized seeds are eaten with food.                                     |
| 33 | <b>Euphorbiaceae</b><br><i>Ricinodendron heudelotii</i> (Bails.) Heckel | Njangsang | IS | Few       | Food additive,<br>Timber                                                           | 11 |                     |                                                     |                                                                           |
| 34 | <b>Euphorbiaceae</b><br><i>Sorindeia mibroedi</i> Engle & Brehmer       | -         | ES | Few       | Ornamentals,<br>Shade                                                              | 3  |                     |                                                     |                                                                           |
| 35 | <b>Guttiferae</b><br><i>Garcinia kola</i> Heckel. Engle                 | Ibi-aku   | ES | Few       | Fruits are eaten,<br>Timber,<br>Medicine                                           | 9  | Fruits<br>Root bark | Aphrodisiac,<br>Gastritis<br>Tuberculosis<br>Asthma | Fruits are eaten.<br>Decoction is taken orally.                           |
| 36 | <b>Huaceae</b><br><i>Afrostrirax lepidophyllus</i> Dougl.ex.Loud        | Fulum     | IS | Few       | Food additive,<br>Agroforestry                                                     | 7  |                     |                                                     |                                                                           |
| 37 | <b>Ixoraceae</b><br><i>Ixora foliosa</i> Hiern.                         | Fegvu     | IS | Many      | Fuelwood,<br>Construction materials                                                | 19 |                     |                                                     |                                                                           |
| 38 | <b>Lauraceae</b><br><i>Persea americana</i> Mil.                        | Pear tree | ES | Available | Medicine, Fruits are eaten<br>Agroforestry,<br>Seeds are used in dyeing activities | 30 | Leaves              | Hypertention<br>Jaundice                            | Decoction with a bit of salt is taken orally<br>Decoction is taken orally |
| 39 | <b>Loganiaceae</b>                                                      | Fighia    | IS | Rare      | Musical                                                                            | 7  |                     |                                                     |                                                                           |



|    |                                                                         |          |    |           |                                                          |                                                  |                |                          |                                                                                           |  |
|----|-------------------------------------------------------------------------|----------|----|-----------|----------------------------------------------------------|--------------------------------------------------|----------------|--------------------------|-------------------------------------------------------------------------------------------|--|
|    | <i>Nuxia congesta</i><br>R.Br.ex.Fresen.                                |          |    |           |                                                          | instruments,<br>Honey<br>production,<br>Fuelwood |                |                          |                                                                                           |  |
| 40 | <b>Meliaceae</b><br><i>Azadirachta indica</i><br>L.                     | Neem     | IS | Few       | Medicine,<br>Timber for<br>construction                  | 7                                                | Leaves<br>Bark | Skin diseases<br>Malaria | Decoction or<br>infusion is taken<br>orally or as a bath.<br>Decoction is taken<br>orally |  |
| 41 | <b>Meliaceae</b><br><i>Carapa grandiflora</i><br>Sprague                | Evin     | ES | Few       | Timber for<br>construction,<br>Fuelwood                  | 11                                               |                |                          |                                                                                           |  |
| 42 | <b>Meliaceae</b><br><i>Chlorophora<br/>excelsa</i><br>Benth and Hook f. | Iroko    | ES | Few       | Timber for<br>construction,<br>Medicine, Wood<br>carving | 3                                                |                |                          |                                                                                           |  |
| 43 | <b>Meliaceae</b><br><i>Entandrophragma<br/>cylindricum</i><br>Sprague   | Mahogany | IS | Few       | Timber for<br>construction,<br>Fuelwood                  | 14                                               |                |                          |                                                                                           |  |
| 44 | <b>Meliaceae</b><br><i>Khaya senegalensis</i><br>(Desr.) A. Juss.       | Mahogany | IS | Rare      | Timber,<br>Fuelwood                                      | 11                                               |                |                          |                                                                                           |  |
| 45 | <b>Melanthaceae</b><br><i>Bersama<br/>abyssinica</i><br>Fresen          | -        | ES | few       | Fuelwood,<br>Medicine                                    | 2                                                | Bark           | Round worms              | Decoction is taken<br>orally                                                              |  |
| 46 | <b>Mimosaceae</b><br><i>Acacia spectabilis</i><br>A.Cunn.ex.Benth.      | -        | ES | Available | Ornamentals,<br>Improve soil<br>fertility, Fodder        | 19                                               |                |                          |                                                                                           |  |

|    |                                                                                |                  |    |           |                                                                                                |    |                  |                                                             |                                                                         |
|----|--------------------------------------------------------------------------------|------------------|----|-----------|------------------------------------------------------------------------------------------------|----|------------------|-------------------------------------------------------------|-------------------------------------------------------------------------|
| 47 | <b>Mimosaceae</b><br><i>Albizia gummifera</i><br>(J.F.Gmel) C.A.               | Fuwem            | IS | Few       | Fuelwood, Tool handles, Medicine                                                               | 7  | Bark ,<br>Leaves | Constipation, Bile<br>Filaria, eye pains<br>Abdominal pains | Decoction is taken orally<br>Decoction is taken orally and as eye drop. |
| 48 | <b>Mimosaceae</b><br><i>Calliandra callothyrsus</i><br>Meissn.                 | -                | ES | Available | Ornamentals, Green manure, Fodder                                                              | 28 |                  |                                                             |                                                                         |
| 49 | <b>Mimosaceae</b><br><i>Leucaena leucocephala</i> Lam.<br>De Wit               | -                | ES | Available | Green manure, Agroforestry                                                                     | 29 |                  |                                                             |                                                                         |
| 50 | <b>Moraceae</b><br><i>Ficus chlamydocarpa</i><br>(Warb) ex Mildbr. &<br>Burret | Fig tree         | IS | Rare      | Fruits are used to feed domestic animals and birds, Planted on boundaries                      | 17 |                  |                                                             |                                                                         |
| 51 | <b>Moraceae</b><br><i>Ficus elastica</i><br>Robx.                              | Male stick       | IS | Available | Latex used to set traps for birds, Produces gum<br>Food for livestock<br>Planted on boundaries | 13 |                  |                                                             |                                                                         |
| 52 | <b>Moraceae</b><br><i>Ficus exasperata</i><br>Vahl.                            | Sand-pepper tree | IS | Available | Sponge for cleaning household                                                                  | 7  | Leaves           | Haemorrhoids (Piles), Boils<br>Ringworms                    | Pulverized leaves are applied topically                                 |

|    |                                                                  |          |    |           |                                                                   |    |                   |                                                    |                                                                                          |
|----|------------------------------------------------------------------|----------|----|-----------|-------------------------------------------------------------------|----|-------------------|----------------------------------------------------|------------------------------------------------------------------------------------------|
|    |                                                                  |          |    |           | utencils,<br>Medicine                                             |    |                   | Chest pain                                         | Scrape affected part with leaf. Pulverized dried leaves are taken orally                 |
| 53 | <b>Moraceae</b><br><i>Ficus natalensis</i><br>Hochst.            | Fegvum   | IS | Few       | Timber for construction,<br>Shade                                 | 3  |                   |                                                    |                                                                                          |
| 54 | <b>Moraceae</b><br><i>Ficus vogelii</i> (Miq.)<br>Miq            | Aloin    | IS | Few       | Fodder, Life fences                                               | 1  |                   |                                                    |                                                                                          |
| 55 | <b>Myrsinaceae</b><br><i>Maesa lanceolata</i><br>Forssk          | Seim     | ES | Rare      | Fuelwood,<br>Medicine                                             | 13 | Fruits            | Ascaries and round worms                           | Crushed fruits are orally taken as a single dose                                         |
| 56 | <b>Myrtaceae</b><br><i>Callistemon viminalis</i> L.              | -        | ES | Few       | Ornamentals,<br>Shade,<br>Boundaries,<br>Timber for construction. | 12 |                   |                                                    |                                                                                          |
| 57 | <b>Myrtaceae</b><br><i>Eucalyptus globulus</i><br>(Labill.) Pers | Gum tree | ES | Available | Timber for construction,<br>Fuelwood, Shade,<br>Medicine          | 10 | Flowers<br>Leaves | Cough<br>Catarrh<br>asthma<br>malaria,<br>Jaundice | Cold infusion or decoction is taken orally<br>Decoction is taken orally                  |
| 58 | <b>Myrtaceae</b><br><i>Psidium guajava</i><br>L.A                | Futam    | IS | Available | Fruits are eaten,<br>Medicine, Tool handles                       | 23 | Leaves            | Dysentery<br>Diarrhoea                             | Pulverized leaves are eaten with the nuts of <i>Elaeis guineensis</i> .<br>Maceration is |

|    |                                                                   |         |    |           |                                                                                                                      |    |                     |                                                                              |
|----|-------------------------------------------------------------------|---------|----|-----------|----------------------------------------------------------------------------------------------------------------------|----|---------------------|------------------------------------------------------------------------------|
|    |                                                                   |         |    |           |                                                                                                                      |    | Jaundice, Cough     | taken of young leaves is taken orally.                                       |
|    |                                                                   |         |    |           |                                                                                                                      |    | Catarrh, Gonorrhoea | Concoction with <i>Prunus africana</i> is orally taken.                      |
| 59 | <b>Myrtaceae</b><br><i>Syzygium staudtii</i><br>(Engl.) Mildbr.   | Ugweih  | IS | Few       | Honey production ,<br>Wood carving,<br>Fuelwood                                                                      | 11 |                     |                                                                              |
| 60 | <b>Papilionaceae</b><br><i>Entada abyssinica</i><br>Steud ex Rich | Felvung | IS | Rare      | Medicine,<br>Fuelwood                                                                                                | 11 | Bark                | Gonorrhoea<br>Syphilis,<br>Candidiasis,<br>Male and<br>Female<br>infertility |
| 61 | <b>Papilionaceae</b><br><i>Erythrina excelsa</i><br>(Welw.) C.DC. | Sapelli | IS | Available | Ornamental,<br>Shade and<br>Construction                                                                             | 7  |                     |                                                                              |
| 62 | <b>Papilionaceae</b><br><i>Millettia conrauri</i><br>De wild      | Efume   | IS | Few       | Wood carving,<br>Bark is used to<br>make oil<br>Containers and<br>coffins for<br>traditional<br>leaders,<br>Medicine | 13 |                     |                                                                              |
| 63 | <b>Papilionaceae</b><br><i>Newtonia</i>                           | Aloni   | IS | Available | Wood<br>carving,Tool                                                                                                 | 1  |                     |                                                                              |

|    |                                                                    |             |    |           |                                                      |    |        |                                            |                                                                                               |
|----|--------------------------------------------------------------------|-------------|----|-----------|------------------------------------------------------|----|--------|--------------------------------------------|-----------------------------------------------------------------------------------------------|
|    | <i>buchananii</i> Baker                                            |             |    |           | handles,<br>Fuelwood                                 |    |        |                                            |                                                                                               |
| 64 | <b>Papilionaceae</b><br><i>Pterocarpus soyauxii</i> Taub.          | Cam wood    | IS | Few       | Red pigment is used in traditional marriages, Timber | 21 | Bark   | Madness<br>Anaemia<br>Against evil spirits | Put pulverized bark into nostrils. Decoction is taken orally<br>Powdered bark is taken orally |
| 65 | <b>Pinaceae</b><br><i>Pinus sylvestris</i> Dougl.ex Loud           | Pine        | ES | Few       | Timber, Shade, Fuelwood                              | 9  |        |                                            |                                                                                               |
| 66 | <b>Podocarpaceae</b><br><i>Podocarpus mannii</i> Thunb.            | Nkeng       | IS | Many      | Timber, Ornamentals, Fuelwood                        | 16 |        |                                            |                                                                                               |
| 67 | <b>Podocarpaceae</b><br><i>Podocarpus latifolius</i> (Thunb) Mirb. | Nkeng-aku   | IS | Available | Timber, Ornamentals, Fuelwood                        | 3  |        |                                            |                                                                                               |
| 68 | <b>Proteaceae</b><br><i>Grevillea robusta</i> A.Cunn.              | -           | ES | Available | Honey production, Timber for construction, Shade     | 21 |        |                                            |                                                                                               |
| 69 | <b>Rhamnaceae</b><br><i>Maesopsis eminii</i> Engl.                 | Fang kijem  | ES | Available | Timber, Shade, Fuelwood, Medicine                    | 17 |        |                                            |                                                                                               |
| 70 | <b>Rosaceae</b>                                                    | Kanda stick | ES | Many      | Fuelwood,                                            | 29 | Leaves | Hypertention                               | Decoction with a                                                                              |

|    |                                                                 |             |    |           |                                            |    |                  |                                                    |                                                                                                         |
|----|-----------------------------------------------------------------|-------------|----|-----------|--------------------------------------------|----|------------------|----------------------------------------------------|---------------------------------------------------------------------------------------------------------|
|    | <i>Prunus africana</i><br>(Hook.F.) Kalkman                     |             |    |           | Timber,<br>Medicine                        |    |                  | Jaundice                                           | bit of salt is taken orally.<br>Decoction is taken orally.                                              |
| 71 | <b>Rutaceae</b><br><i>Citrus aurantifolia</i><br>Swingle        | Lime        | ES | Few       | Fruits are eaten,<br>Agroforestry<br>plant | 5  | Leaves<br>Fruits | Abdominal<br>pains<br>Filaria                      | Decoction is taken orally.<br>Juice is applied on the body after a bath.                                |
| 72 | <b>Rutaceae</b><br><i>Citrus limon</i> Meyer                    | Grape       | ES | Few       | Fruits are eaten,<br>Agroforestry          | 5  | Fruits<br>Leaves | Cough, Loss of<br>appetite<br>Goitre,<br>impotence | Juice from ripe fruits is taken orally.<br>Maceration of leaves is taken orally.                        |
| 73 | <b>Rutaceae</b><br><i>Citrus paradisi</i><br>Gros Sujet.        | Lemon       | ES | Available | Fruits are eaten,<br>Agroforestry          | 14 | Fruit            | Tuberculosis                                       | Juice is taken orally.                                                                                  |
| 74 | <b>Rutaceae</b><br><i>Citrus sinensis</i> L.                    | Orange      | ES | Available | Fruits are eaten,<br>Agroforestry          | 10 | Fruit<br>Leaves  | Tuberculosis<br>Malaria                            | Juice is taken orally<br>Concoction with <i>Bidens pilosa</i> and <i>Carica papaya</i> is taken orally. |
| 75 | <b>Sapindaceae</b><br><i>Allophylus bullatus</i><br>Radlk       | -           | IS | Few       | Ornamental,<br>Timber for<br>construction  | 8  |                  |                                                    |                                                                                                         |
| 76 | <b>Solanaceae</b><br><i>Cyphomandra</i><br><i>betacea</i> (Cav) | Ajuanjongna | IS | Few       | Fruits are eaten                           | 9  |                  |                                                    |                                                                                                         |

| Sendt. |                                                                            |                |    |           |                                                                                   |    |                                        |                                       |                                                                                                                           |
|--------|----------------------------------------------------------------------------|----------------|----|-----------|-----------------------------------------------------------------------------------|----|----------------------------------------|---------------------------------------|---------------------------------------------------------------------------------------------------------------------------|
| 77     | <b>Solanaceae</b><br><i>Solanum torvum</i> L.                              | Finyiah        | IS | Available | Grown in farms as a panacea for witchcrafts, Medicine                             | 13 | Fruit, bark<br>Leaves<br>Fruits, roots | Infertility<br>Gastritis<br>Pneumonia | Decoction is taken orally.<br>Leaves are chewed with limestone.<br>Pulverized roots and fruits in water are taken orally. |
| 78     | <b>Sterculiaceae</b><br><i>Cola acuminata</i> (P.Beauv.) Scohott and Engl. | Ibi (Cola nut) | IS | Available | Fruits are eaten, Agroforestry, Medicine, Seeds used to dye traditional equipment | 33 | Bark<br>Fruits                         | Gonorrhoea<br>Cough                   | Decoction is taken orally.<br>Fruits are eaten.                                                                           |
| 79     | <b>Thymeleaceae</b><br><i>Gnidia glauca</i> (Fresen.) Grilg.               | Ejeo           | IS | Available | Fuelwood, Construction materials                                                  | 11 |                                        |                                       |                                                                                                                           |
| 80     | <b>Ulmaceae</b><br><i>Trema guineensis</i> (L.) Blume.                     | Fang kom       | IS | Few       | Toolhandles, Fuelwood, Medicine                                                   | 21 | Leaves                                 | Male and female infertility           | Maceration or infusion is taken orally                                                                                    |
| 81     | <b>Verbenaceae</b><br><i>Gmelina arborea</i> L.                            | Abiuuy         | ES | Few       | Timber for construction, Fuelwood, Tool handles                                   | 7  |                                        |                                       |                                                                                                                           |
| 82     | <b>Verbenaceae</b><br><i>Vitex doniana</i> Schum. & Thonn.                 | -              | IS | Few       | Timber, Fuelwood, Medicine                                                        | 7  | Bark                                   | Syphilis                              | Concoction with bark of <i>Voacanga africana</i> is taken orally                                                          |

Habitat: ES = Exotic species, IN = Indigenous species, IS = Introduced species.

No. spp: number of species Freq: frequency of respondents
